# Supplementary material
Source: bioRxiv or medRxiv preprint supplement (https://www.biorxiv.org/highwire/filestream/22672/field_highwire_adjunct_files/0/077644-1.pdf)
Supplement: Supplementary file [file 077644-1.pdf]

**Table S1. Candidate genes required for mechanical nociception responses**

| CG number                                 | Synonym                                                          | RNAi line  | Ballistic Response (%) | p-value          | Gene Ontology                                                                                                                                                        | Required for thermal nociception | Predicted mouse orthologs                     |
|-------------------------------------------|------------------------------------------------------------------|------------|------------------------|------------------|----------------------------------------------------------------------------------------------------------------------------------------------------------------------|----------------------------------|-----------------------------------------------|
| Hypersensitive candidate: <i>md-GAL4</i>  |                                                                  |            |                        |                  |                                                                                                                                                                      |                                  |                                               |
| CG31323                                   | CG31323                                                          | GD v45064  | 64.9 ± 7.8             | 0.0165<br>p<0.05 | Unknown                                                                                                                                                              |                                  |                                               |
| CG8282                                    | <i>Sorting nexin 6 (Snx6)</i>                                    | GD v24275  | 61.4 ± 7.3             | 0.029<br>p<0.05  | Phosphatidylinositol-3-phosphate binding; Protein transporter activity; Retrograde intracellular transport, endosome to golgi                                        |                                  | Snx6 <sup>df</sup> , Snx32                    |
| CG32592                                   | <i>highwire</i>                                                  | GD v26998  | 59.3 ± 6.7             | 0.035<br>p<0.05  | Ubiquitin-protein ligase activity                                                                                                                                    |                                  | <i>Mycbp2<sup>f</sup></i>                     |
| Insensitive candidates: <i>md-GAL4</i>    |                                                                  |            |                        |                  |                                                                                                                                                                      |                                  |                                               |
| CG7646                                    | CG7646                                                           | GD v35740  | 21.4 ± 6.3             | 0.0045<br>p<0.01 | Calcium ion binding                                                                                                                                                  |                                  | <i>Rcvrn</i>                                  |
| CG33202                                   | <i>defective proboscis extension response 11 (dpr11)</i>         | GD v23243  | 23.7 ± 6.9             | 0.0137<br>p<0.05 | Immunoglobulin (Ig) family, membrane protein                                                                                                                         | Yes <sup>a,c</sup>               |                                               |
| CG4394                                    | <i>TNF-receptor-associated factor-like (TRAF3)</i>               | GD v34836  | 25.0 ± 6.8             | 0.018<br>p<0.05  | Signal transduction; Defense response                                                                                                                                |                                  |                                               |
| CG4398                                    | CG4398                                                           | KK v104199 | 34.0 ± 6.7             | 0.028<br>p<0.05  | Dynein-binding, microtubule organization                                                                                                                             | Yes <sup>a,c</sup>               | <i>Pafah1b1<sup>df</sup></i>                  |
| CG6220                                    | CG6220                                                           | KK v108909 | 33.3 ± 7.0             | 0.03<br>p<0.05   | Transcription factor activity; RNA polymerase II transcription factor binding                                                                                        |                                  | <i>Cdc73<sup>d</sup></i>                      |
| CG4771                                    | <i>vreteno (vret)</i>                                            | KK v101134 | 32.4 ± 8.0             | 0.038<br>p<0.05  | regulation of gene silencing by RNA; piRNA metabolic process; RNA-mediated negative regulation of transposition; oogenesis; germarium-derived egg chamber formation. |                                  |                                               |
| CG4741                                    | CG4741                                                           | GD v51510  | 27.0 ± 7.3             | 0.038<br>p<0.05  | Unknown                                                                                                                                                              |                                  |                                               |
| CG44122                                   | <i>Piezo</i>                                                     | GD v25781  | 26.5 ± 7.6             | 0.039<br>p<0.05  | Mechanically gated ion channel activity                                                                                                                              | Yes <sup>a</sup>                 | <i>Piezo2<sup>d,e,f</sup></i> , <i>Piezo1</i> |
| Hypersensitive candidate: <i>ppk-GAL4</i> |                                                                  |            |                        |                  |                                                                                                                                                                      |                                  |                                               |
| CG2204                                    | <i>G protein α o subunit (Gao)</i>                               | GD v19124  | 73.5 ± 7.6             | 0.009<br>p<0.01  | G-protein beta/gamma-subunit complex binding; G-protein-coupled receptor binding; GTPase activity; signal transducer activity                                        | Yes <sup>b</sup>                 | <i>Gnao1<sup>d,e,f</sup></i>                  |
| CG10806                                   | <i>Na<sup>+</sup>/H<sup>+</sup> hydrogen antiporter 1 (Nha1)</i> | KK v110016 | 70.3 ± 7.5             | 0.009<br>p<0.01  | Sodium:proton antiporter activity; Transmembrane transport                                                                                                           |                                  | <i>Slc9b1</i>                                 |
| Insensitive candidates: <i>ppk-GAL4</i>   |                                                                  |            |                        |                  |                                                                                                                                                                      |                                  |                                               |
| CG8440                                    | <i>lissencephaly-1 (Lis-1)</i>                                   | KK v106777 | 19.4 ± 7.1             | 0.008<br>p<0.01  | Dynein-binding, microtubule organization                                                                                                                             | Yes <sup>a,c</sup>               | <i>Pafah1b1<sup>df</sup></i>                  |
| CG1152                                    | <i>glucose dehydrogenase (Gld)</i>                               | GD v38040  | 25.6 ± 6.7             | 0.008<br>p<0.01  | Glucose metabolism; oxidation-reduction process                                                                                                                      | Yes <sup>c</sup>                 | <i>Chdh</i>                                   |
| CG33202                                   | <i>defective proboscis extension response 11 (dpr11)</i>         | GD v23243  | 22.6 ± 7.5             | 0.008<br>p<0.01  | Immunoglobulin (Ig) family, membrane protein                                                                                                                         | Yes <sup>a,c</sup>               |                                               |
| CG8297                                    | CG8297                                                           | GD v46760  | 24.2 ± 7.5             | 0.011<br>p<0.05  | Unknown                                                                                                                                                              |                                  | <i>Txndc15</i>                                |
| CG7649                                    | <i>Meltrin</i>                                                   | GD v8394   | 23.3 ± 7.7             | 0.011<br>p<0.05  | Metalloendopeptidase activity                                                                                                                                        |                                  | <i>Adam12</i>                                 |
| CG10914                                   | CG10914                                                          | KK v108735 | 26.1 ± 6.5             | 0.021<br>p<0.05  | GTP binding                                                                                                                                                          |                                  | <i>Noa1</i>                                   |
| CG1715                                    | <i>lethal (3) 03670</i>                                          | GD v52253  | 28.6 ± 7.6             | 0.030<br>p<0.05  | Unknown                                                                                                                                                              |                                  | <i>Chchd3</i>                                 |
| CG4840                                    | <i>centrosomin's beautiful sister (cbs)</i>                      | GD v21959  | 30.0 ± 7.2             | 0.033<br>p<0.05  | Protein homodimerization activity; ADP-ribosylation factor binding; Rab GTPase binding.                                                                              |                                  | <i>Golga1<sup>f</sup></i>                     |
| CG12530                                   | <i>Cdc42</i>                                                     | JF02855    | 10.8 ± 5.1             | 0.045<br>p<0.05  | Rho GTPase activity                                                                                                                                                  |                                  | <i>Cdc42<sup>d</sup></i>                      |
| CG7297                                    | <i>polypeptide GalNAc transferase 8 (pgant8)</i>                 | GD v8377   | 30.6 ± 7.7             | 0.046<br>p<0.05  | Polypeptide N-acetylgalactosaminyltransferase activity                                                                                                               |                                  | <i>Galnt5<sup>df</sup></i> , <i>Galnt15</i>   |

*a* insensitive in larval thermal nociception assay in Honjo et al. 2016

*b* hypersensitive in larval thermal nociception assay in Honjo et al. 2016

*c* required for adult noxious thermal heat avoidance in Neely et al. 2010

*d* genes enriched in nociceptive lineage neurons compared to proprioceptive lineage neurons in Chiu et al. 2014

*e* genes enriched in nociceptors compared to unpurified DRG neurons in Thakur et al. 2014

*f* genes enriched in nociceptors compared to cortical neurons in Thakur et al. 2014
